# Supplementary material for: Assessment of the Quorum Sensing Inhibition Activity of a Non-Toxic Chitosan in an N-Acyl Homoserine Lactone (AHL)-Based Escherichia coli Biosensor
Source: PubMed Central journal article supplement (PMC6164843; doi:10.3390/biom8030087), 2018-09-04

Article

# Assessment of the Quorum Sensing Inhibition Activity of a Non-Toxic Chitosan in an AHL-Based *E. coli* Biosensor

Xiaofei Qin <sup>1</sup>, Jana Emich <sup>1</sup> and Francisco M. Goycoolea <sup>1,2,\*</sup>

<sup>1</sup> Institute of Plant Biology and Biotechnology, University of Münster, Schlossplatz 8, 48143 Münster, Germany; qxf200459420@163.com

<sup>2</sup> School of Food Science and Nutrition, University of Leeds, LS2 9JT, Leeds, United Kingdom

\* Correspondence: F.M.Goycoolea@leeds.ac.uk; Tel.: +44 113 343 1412

## Supporting Information

Figure S1. Appearance of *E. coli* Top 10 bacteria suspensions in M9 medium alone and in the presence of varying concentrations of chitosan (as shown in labels).

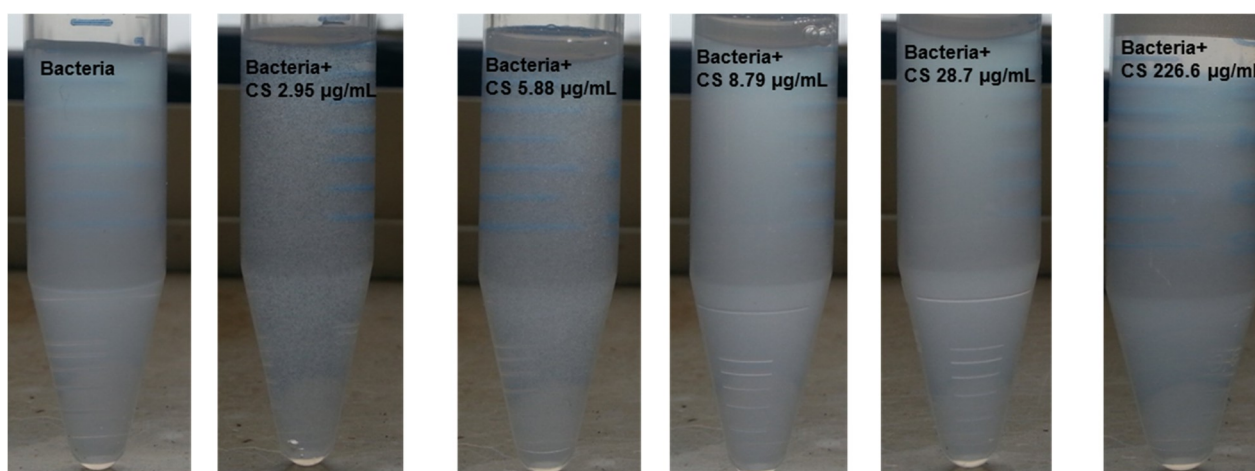

Supplement: biomolecules-08-00087-s001.pdf [file biomolecules-08-00087-s001.pdf]
